# Supplementary material for: RHAMM splice variants confer radiosensitivity in human breast cancer cell lines
Source: PubMed Central journal article supplement (PMC5008296; doi:10.18632/oncotarget.7258), 2016-02-08
Supplement: oncotarget-07-21428-s001.pdf [file oncotarget-07-21428-s001.pdf]

## SUPPLEMENTARY FIGURES

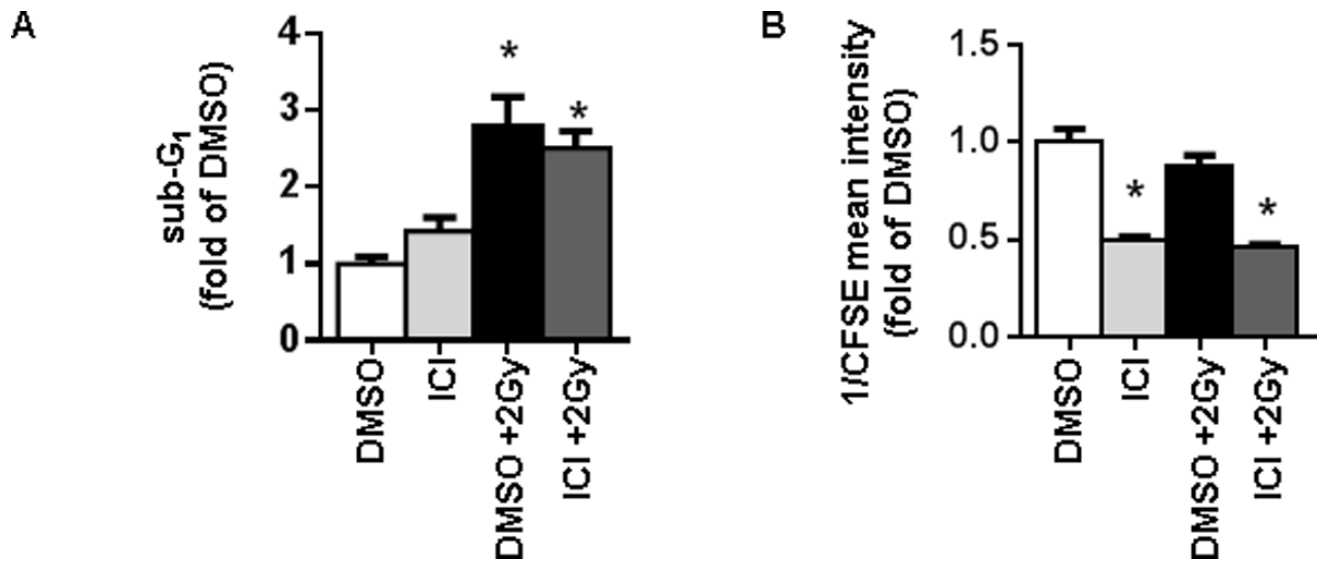

**Supplementary Figure S1: Estrogen receptor status has no effect on MCF-7 cell apoptosis but has an effect on proliferation.** **A.** sub-G<sub>1</sub> analysis and **B.** proliferation rate of MCF-7 cells treated with ICI (unspecific ER-antagonist ICI182780, 10 $\mu$ M) 4h prior to irradiation and harvested 48h post irradiation with 2Gy. \*,  $p < 0.05$  in comparison with MCF-7 cells treated with DMSO.

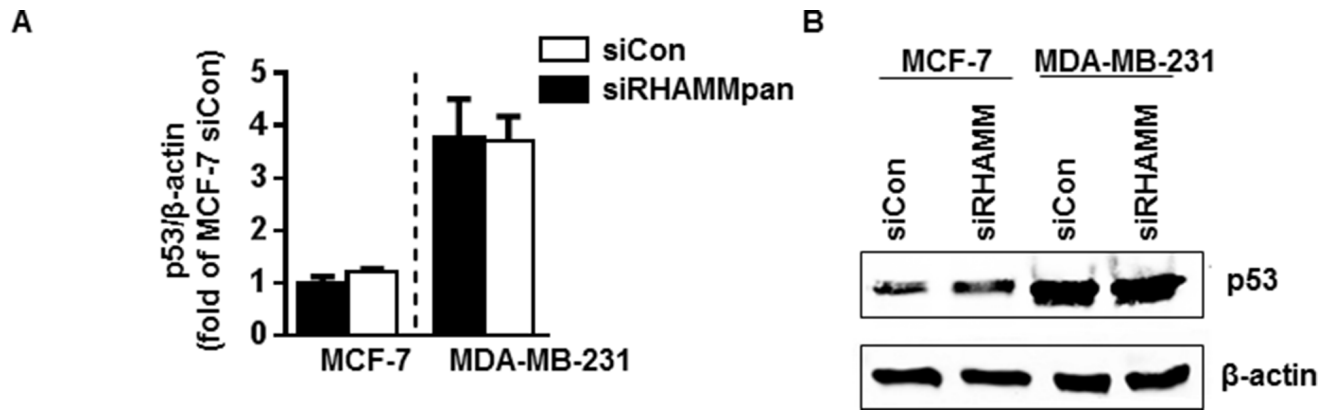

**Supplementary Figure S2: RHAMM knockdown has no effect on p53 expression.** A. western blot analysis of MCF-7 and MDA-MB-231 cells treated with siRNA against RHAMMpan 48h after transfection and B. representative blots.

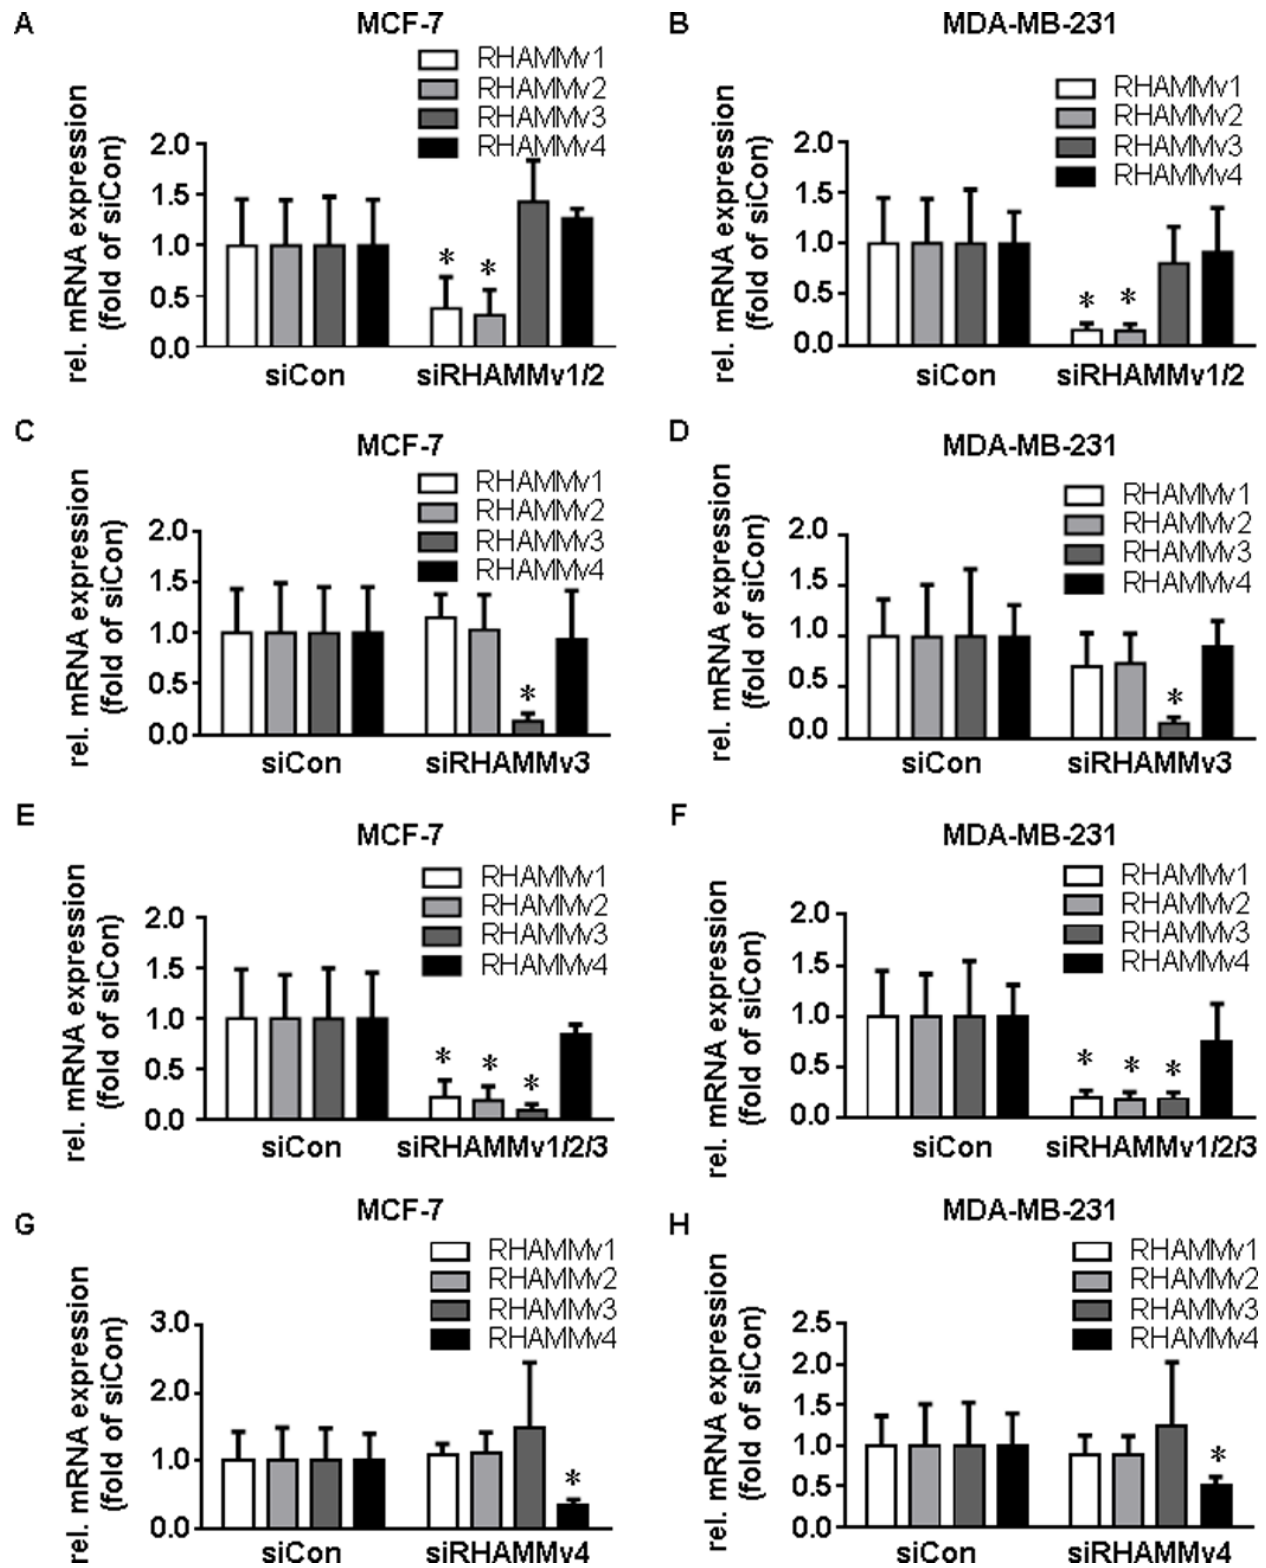

**Supplementary Figure S3: Knockdown efficacy of siRNA of *RHAMM* variants.** Relative mRNA expression of *RHAMM* variants in *siRHAMMv1/2* transfected **A.** MCF-7 and **B.** MDA-MB-231 cells. Relative mRNA expression of *RHAMM* variants in *siRHAMMv3* transfected **C.** MCF-7 and **D.** MDA-MB-231 cells. Relative mRNA expression of *RHAMM* variants in *siRHAMMv1/2/3* transfected **E.** MCF-7 and **F.** MDA-MB-231 cells. Relative mRNA expression of *RHAMM* variants in *siRHAMMv4* transfected **G.** MCF-7 and **H.** MDA-MB-231 cells. \*,  $p < 0.05$  in comparison to respective siControl.
